# Supplementary material for: Can a meso-type dinuclear complex be chiral?: dinuclear β-diketonato Ru(III) complexes
Source: Royal Society of Chemistry journal article supplement (doi:10.1039/c1dt11133g), 2011-09-06
Supplement: c1dt11133g.pdf [file c1dt11133g.pdf]

# Supporting Information for

## Can a Meso-type Dinuclear Complex be Chiral?: Dinuclear $\beta$ -Diketonato Ru(III) Complexes

Hisako Sato<sup>\*a</sup>, Ryoichi Takase,<sup>b</sup> Yukie Mori<sup>c</sup> and Akihiko Yamagishi<sup>\*b</sup>

<sup>a</sup> *Graduated School of Science and Engineering, Ehime University, Matsuyama, Ehime 790-8577, Japan. Fax: +81-89-927-9599; Tel: +81-89-927-9599; E-mail: [sato.hisako.my@ehime-u.ac.jp](mailto:sato.hisako.my@ehime-u.ac.jp)*

<sup>b</sup> *Department of Chemistry, Toho University, Funabashi, Chiba 274-8510, Japan*

<sup>c</sup> *Department of Chemistry, Ochanomizu University, Bunkyo-ku, Tokyo, 112-8610, Japan*

F1 F2 F3

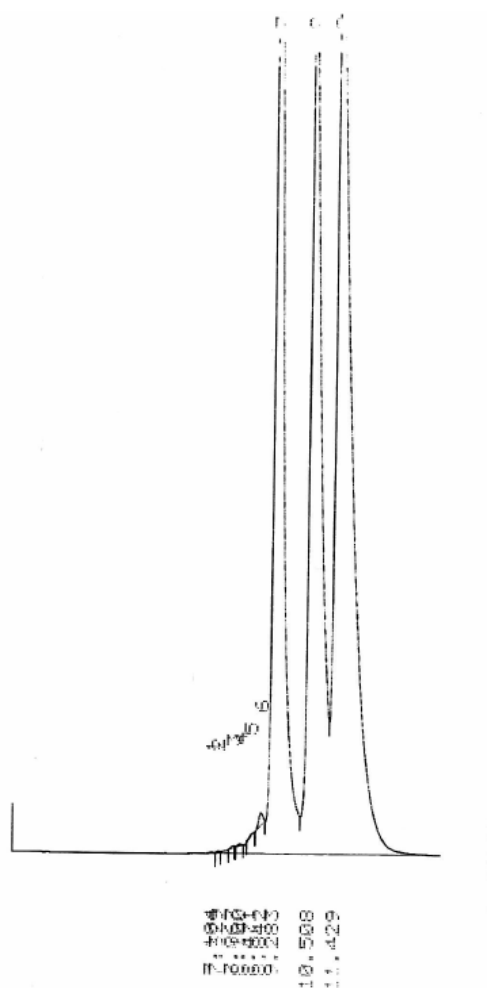

Figure S1 (a). The HPLC chromatogram when a solution of dinuclear Ru(III) complex,  $[\text{Ru(III)(acac)}_2(\text{dabe})\text{Ru(III)(acac)}_2]$ , was eluted on a silica gel column (Inertsil, GL Science Inc., (Japan)) with a solvent of 9:1 (v/v) benzene-acetonitrile at a flow rate of  $0.5 \text{ ml min}^{-1}$ . The eluted solution was monitored by the absorbance at 600 nm. Peaks F<sub>1</sub>, F<sub>2</sub> and F<sub>3</sub> were assigned to be meso-type, racemic and racemic dinuclear complexes, respectively (see text).

## F1 F2

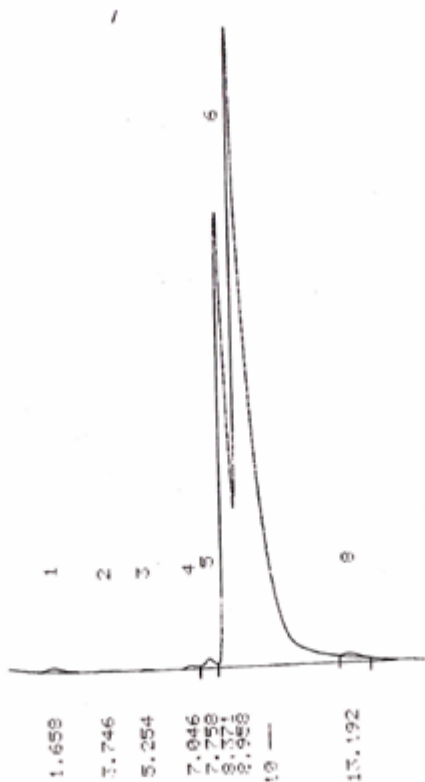

Figure S1(b). The HPLC chromatogram when a solution of dinuclear Ru(III) complex,  $[\text{Ru(III)(acac)}_2(\text{tbet})\text{Ru(III)(acac)}_2]$ , was eluted on a silica gel column (Inertsil, GL Science Inc., (Japan)) with a solvent of 95:5 (v/v) benzene-acetonitrile at a flow rate of  $1 \text{ mlmin}^{-1}$ . The eluted solution was monitored by the absorbance at 600 nm. Peaks  $F_1$  and  $F_2$  were assigned to be meso-type and racemic dinuclear complexes, respectively (see text).

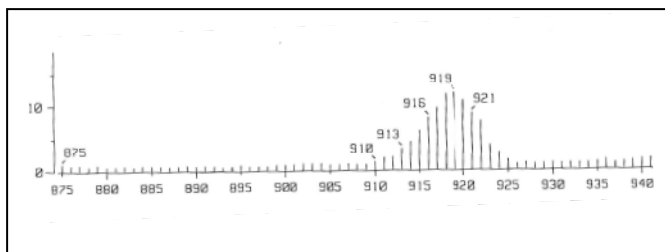

Figure S2 (a). The observed mass spectrum of fraction  $F_1$  in the chromatogram for  $[\text{Ru(III)(acac)}_2(\text{dabe})\text{Ru(III)(acac)}_2]$  (Figure S1(a)). The fractions  $F_2$  and  $F_3$  gave the same results: (m/z) obs: 919 (calc. 918.9).

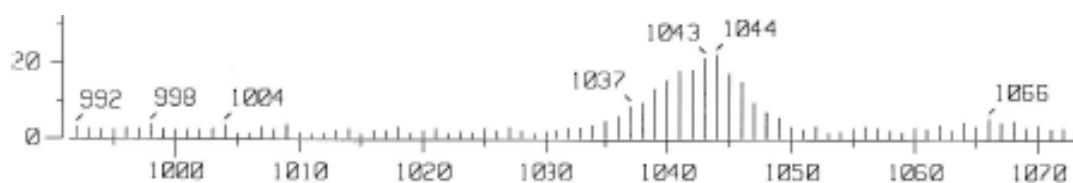

Figure S2 (b). The observed mass spectrum of fraction  $F_1$  in the chromatogram of  $[\text{Ru(III)(acac)}_2(\text{tbet})\text{Ru(III)(acac)}_2]$  (Figure S1(b)). The fractions  $F_2$  gave the same results: (m/z) obs: 1044 (calc. 1043.0).

**$^1\text{H}$  NMR Data (400 MHz,  $\text{CDCl}_3$ ):**

**$[\text{Ru}(\text{acac})_2(\text{CH}_3\text{CN})_2]\text{PF}_6$ :**  $\delta = -26.45$  (6H,  $\text{CH}_3$ ),  $-22.62$  (6H,  $\text{CH}_3$ ),  $37.09$  (6H,  $\text{CH}_3$ )

**dabe $\text{H}_2$ :**  $\delta = 2.08$  (6H, s,  $\text{CH}_3$ ),  $5.91$  (2H, C-H),  $7.57$  (4H, t,  $J = 7$  Hz),  $7.67$  (2H, tt,  $J = 7$  and  $0.6$  Hz),  $8.17$  (4H, dd,  $J = 7$  and  $0.6$  Hz)

**tbet  $\text{H}_2$ :**  $\delta = 6.72$  (2H, s, CH),  $7.36$  (8H, t,  $J = 8$  Hz),  $7.50$  (4H, t,  $J = 8$  Hz),  $7.91$  (8H, d,  $J = 8$  Hz)

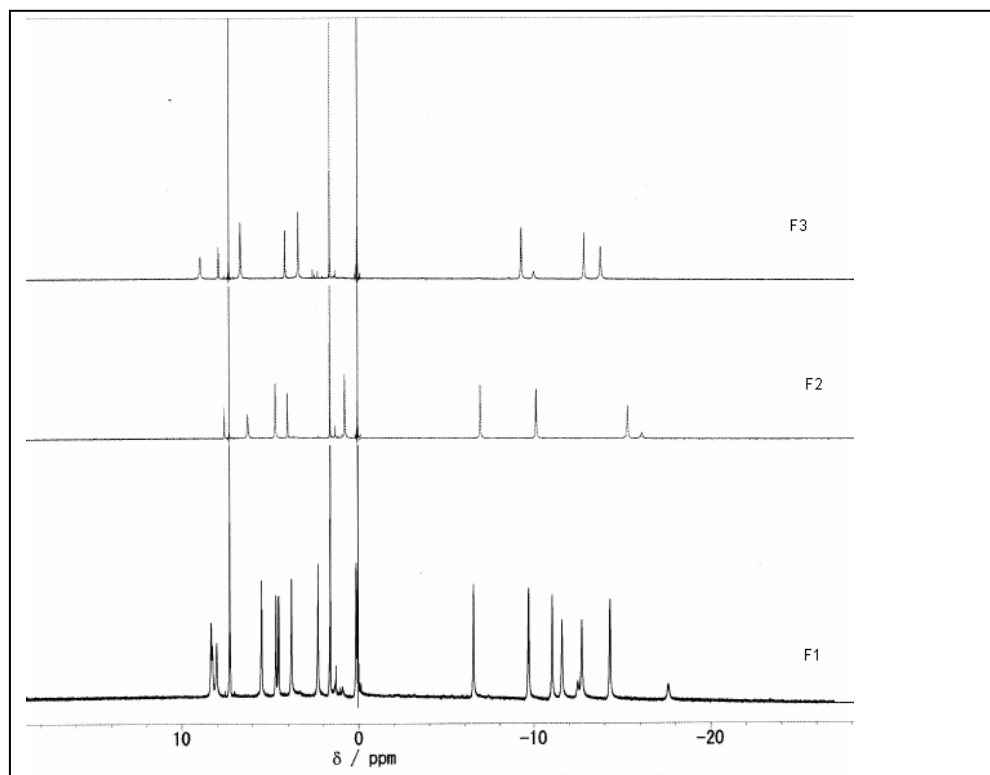

Figure S3(a).  $^1\text{H}$  NMR spectra of fractions  $\text{F}_1$ ,  $\text{F}_2$  and  $\text{F}_3$  in Figure S1(a) of  $[\text{Ru}(\text{III})(\text{acac})_2(\text{dabe})\text{Ru}(\text{III})(\text{acac})_2]$  (400 MHz,  $\text{CDCl}_3$ ): meso-type ( $\text{F}_1$ ) (lower); racemic ( $\text{F}_2$ ) (middle); racemic ( $\text{F}_3$ ) (upper).

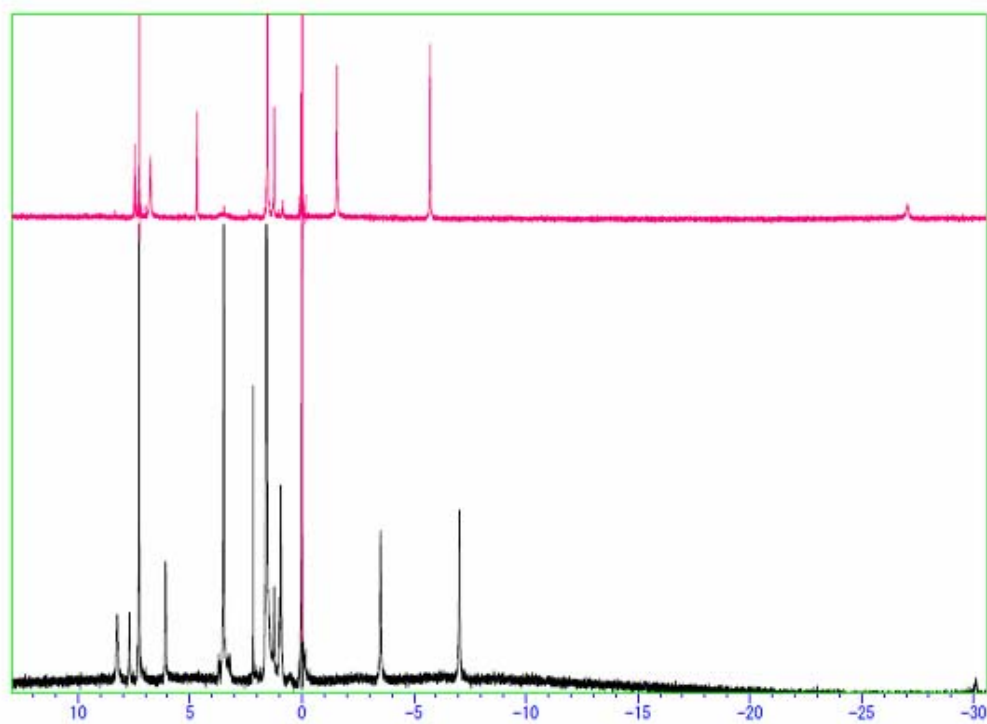

Figure S3(b). <sup>1</sup>H NMR spectra of fractions F<sub>1</sub> and F<sub>2</sub> of [Ru(III)(acac)<sub>2</sub>(tbet)Ru(III)(acac)<sub>2</sub>] (400 MHz, CDCl<sub>3</sub>): meso-type (F<sub>1</sub>) (lower); racemic (F<sub>2</sub>) (upper).

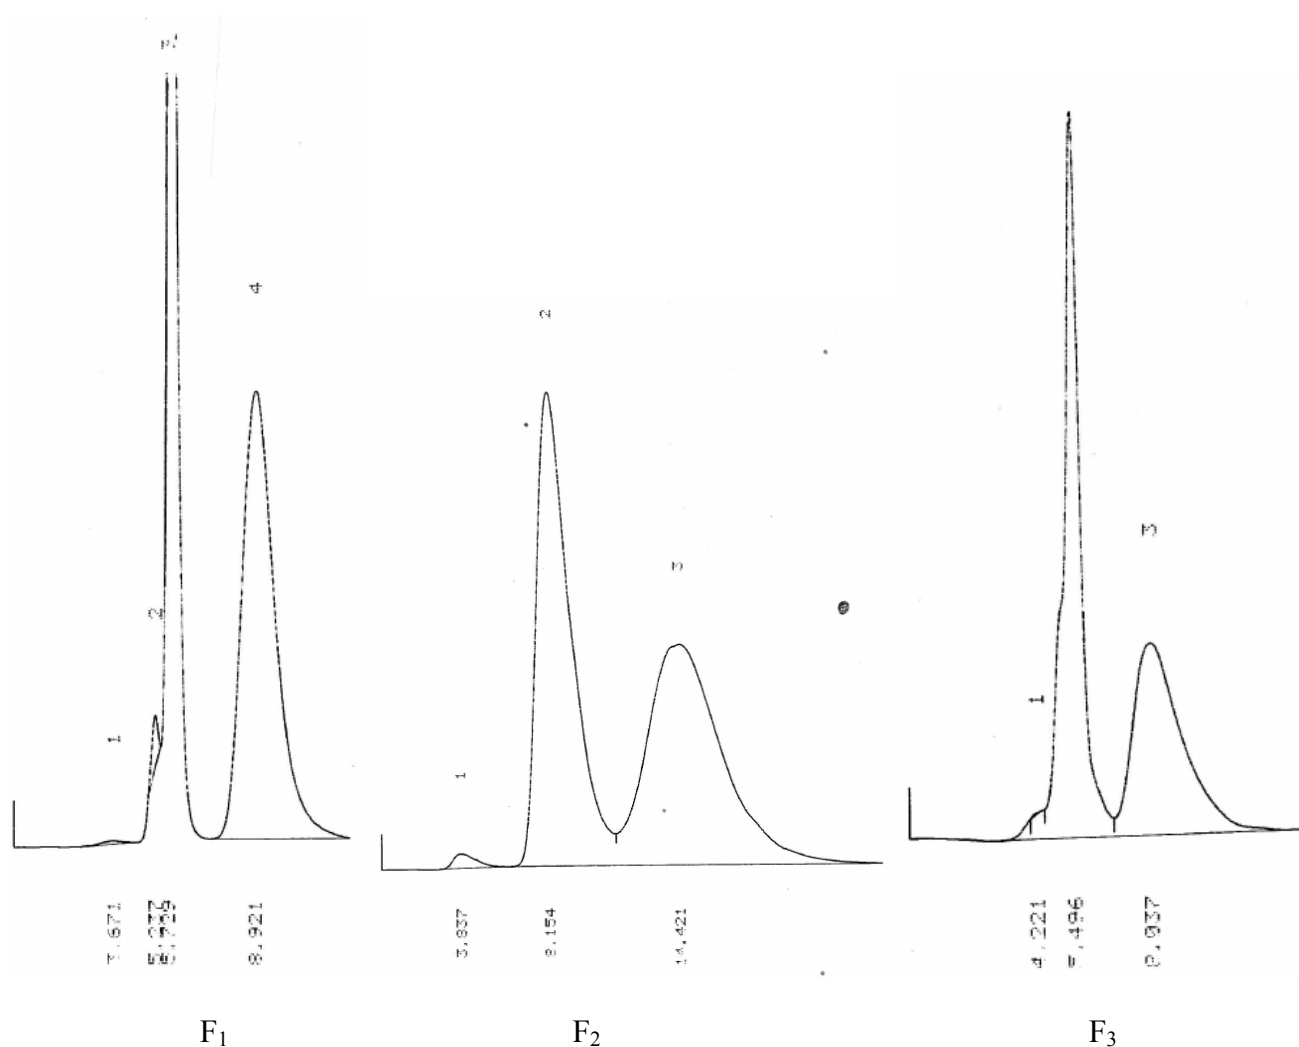

Figure S4(a). The HPLC chromatograms when fractions F<sub>1</sub>, F<sub>2</sub> and F<sub>3</sub> of [Ru(III)(acac)<sub>2</sub>(dabe)Ru(III)(acac)<sub>2</sub>] were eluted on a chiral column (4 mm (i.d.) × 25 cm) at a flow rate of 0.5 ml/min. The column was packed with an ion-exchange adduct of Δ-[Ru(phen)<sub>3</sub>]<sup>2+</sup> (phen = 1,10-phenanthroline) and synthetic hectorite. The eluting solvent was 1:1(v/v) methanol/chloroform mixture. The elution was monitored at 600 nm.

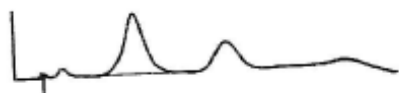

Figure S4(b). The HPLC chromatogram when fraction F<sub>2</sub> of [Ru(III)(acac)<sub>2</sub>(tbet)Ru(III)(acac)<sub>2</sub>] were eluted on the same chiral column. The eluting solvent was 1:1(v/v) methanol/chloroform mixture. The elution was monitored at 600 nm. Fraction F<sub>1</sub> gave a single peak under the same eluting conditions (not shown).

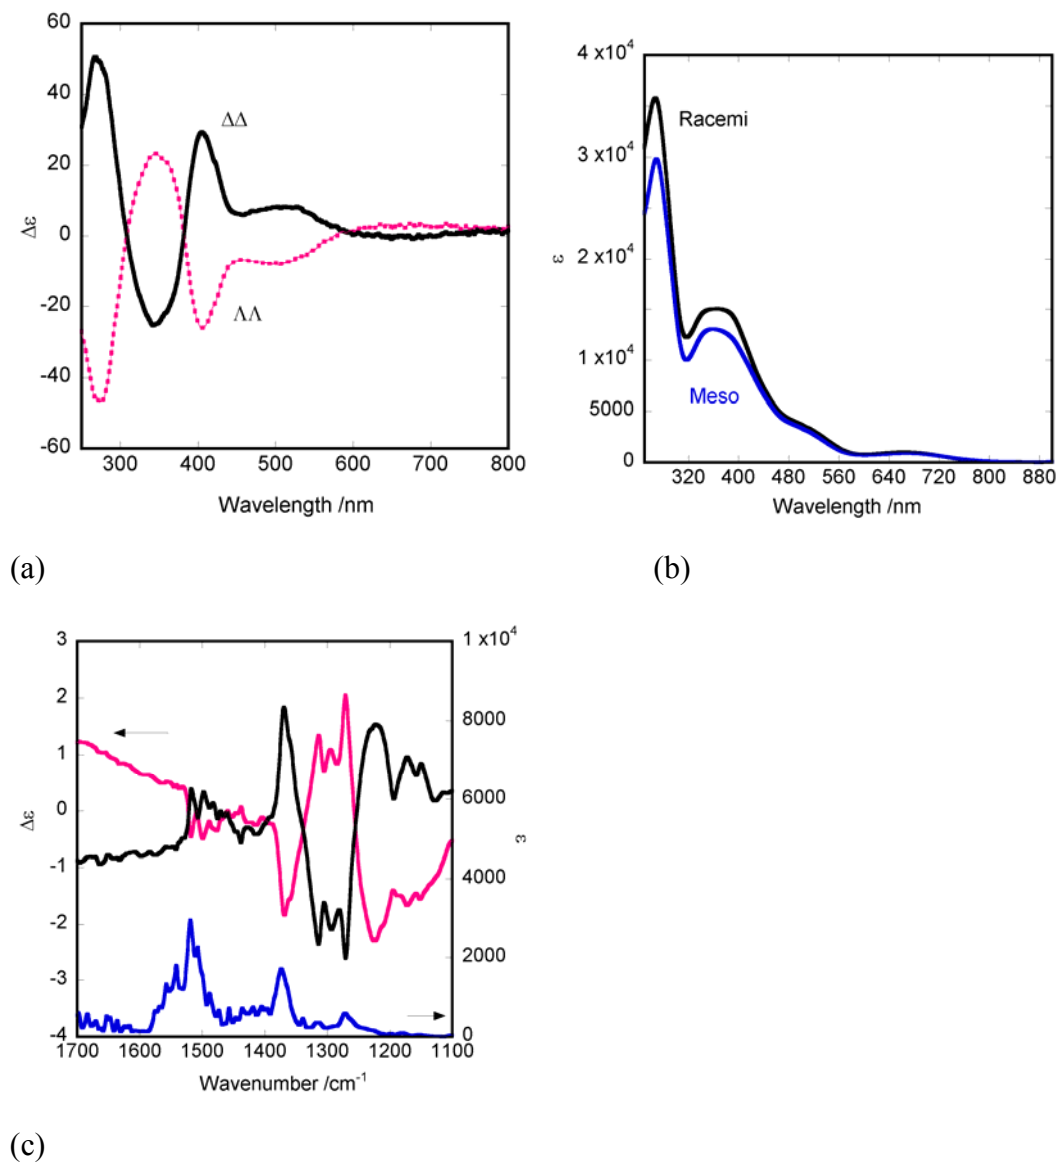

Figure S5. (a) The electronic circular dichroism spectra of racemic  $[\text{Ru(III)(acac)}_2(\text{tbet})\text{Ru(III)(acac)}_2]$ . The solid and dotted (red) curves are for the  $\Delta\Delta$ - and  $\Lambda\Lambda$ -enantiomers, respectively. (b) The UV-vis spectra of meso-type (blue) and racemic-type (black) dimers, respectively. (c) The vibrational circular dichroism spectra of racemic  $[\text{Ru(III)(acac)}_2(\text{tbet})\text{Ru(III)(acac)}_2]$ . The black and red curves are for the  $\Delta\Delta$ - and  $\Lambda\Lambda$ -enantiomers, respectively.



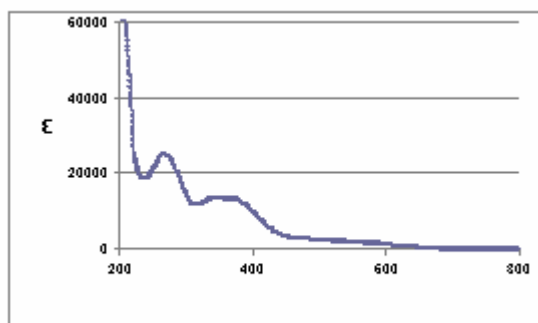

Figure S6(a). The UV-vis spectrum of a methanol solution of  $\Delta\Lambda$ -[Ru(III)(acac)<sub>2</sub>(dabe)Ru(III)(acac)<sub>2</sub>]

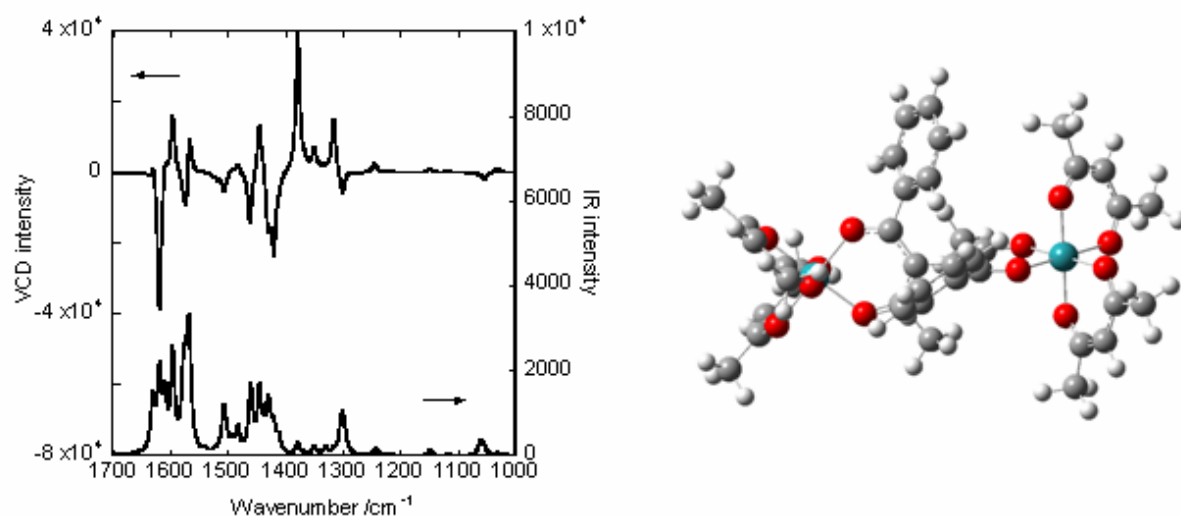

Figure S7. The DFT-calculated VCD (upper) and IR (lower) spectra of  $\Delta\Lambda$ -[Ru(III)(acac)<sub>2</sub>(*S*-dabe)Ru(III)(acac)<sub>2</sub>] for the theoretically optimized structure (right). The vertical axis is  $\Delta\epsilon \times 10^4$  (left) and  $\epsilon$  (right), respectively.
